# Supplementary material for: Exploring the potential of a structural alphabet-based tool for mining multiple target conformations and target flexibility insight
Source: PubMed Central journal article supplement (PMC5560695; doi:10.1371/journal.pone.0182972), 2017-08-17

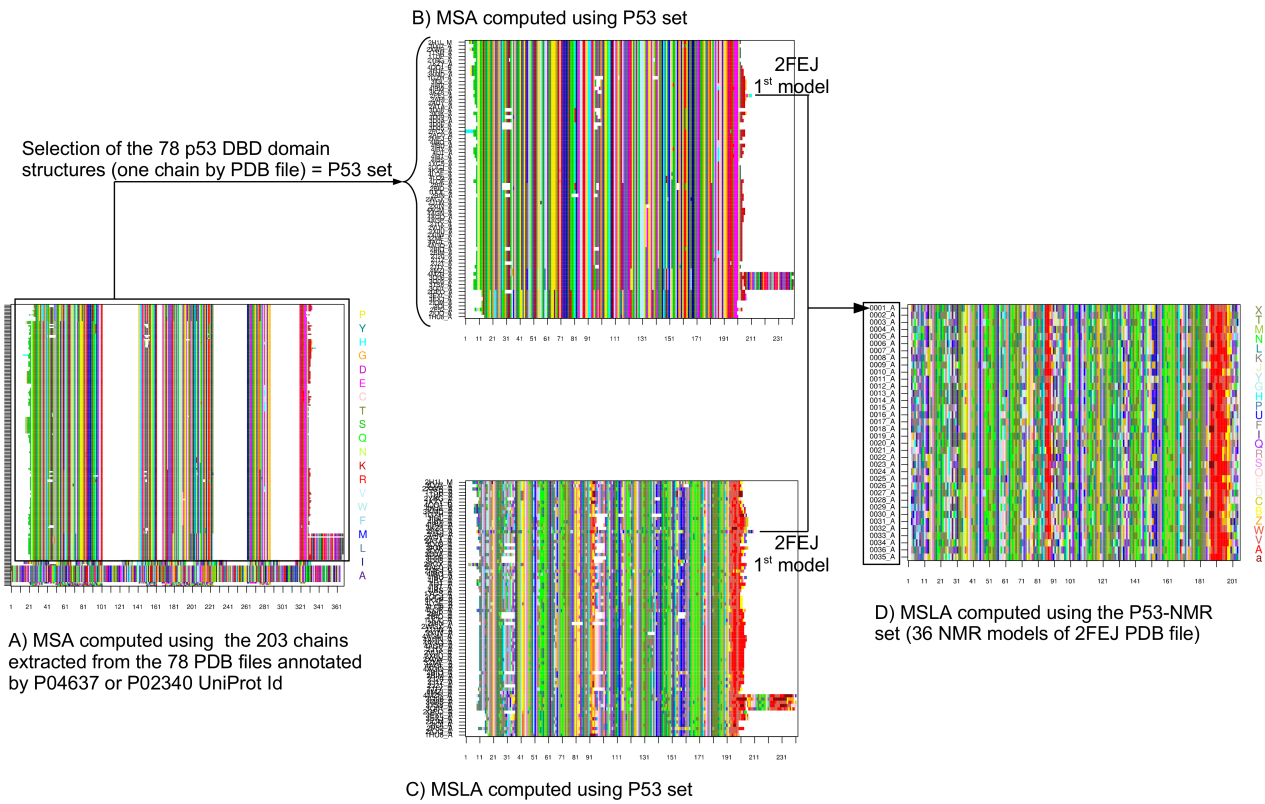

Supplement: pone.0182972.s004.pdf [file pone.0182972.s004.pdf]
