# Supplementary material for: Exploring the potential of a structural alphabet-based tool for mining multiple target conformations and target flexibility insight
Source: PubMed Central journal article supplement (PMC5560695; doi:10.1371/journal.pone.0182972), 2017-08-17
Supplement: pone.0182972.s011.pdf [file pone.0182972.s011.pdf]

| PDB positions | MSA positions | Bond types         | $neq_{AA}$ | $neq_{SL}$  | Structural variable region |
|---------------|---------------|--------------------|------------|-------------|----------------------------|
| 40            | 41            |                    | 1          | 1.31        |                            |
| <b>41</b>     | <b>42</b>     | <b>Hydrophobic</b> | <b>1</b>   | <b>1.74</b> | <b>R1</b>                  |
| <b>42</b>     | <b>43</b>     | <b>Hydrophobic</b> | <b>1</b>   | <b>2.64</b> | <b>R1</b>                  |
| <b>57</b>     | <b>58</b>     | Hydrogen           | <b>1</b>   | <b>1.41</b> |                            |
| 58            | 59            |                    | 1          | 1.5         |                            |
| 96            | 101           | Hydrophobic        | 1          | 1.71        | R3                         |
| 97            | 102           |                    | 1.06       | 2.73        | R3                         |
| 97A           | 103           |                    | 1          | 2.3         | R3                         |
| 97B           | 104           | <b>Hydrophobic</b> | 1          | 2.35        | R3                         |
| 98            | 105           | <b>Hydrophobic</b> | 1          | 1.59        | R3                         |
| 99            | 106           | <b>Hydrophobic</b> | 1          | 1.52        | R3                         |
| 102           | 109           | <b>Hydrogen</b>    | 1          | 1.1         |                            |
| 189           | 204           | <b>Hydrogen</b>    | 1          | <b>1.06</b> |                            |
| 190           | 205           | <b>Hydrogen</b>    | 1.14       | 1.36        |                            |
| 191           | 206           | <b>Hydrophobic</b> | 1          | <b>1</b>    |                            |
| 192           | 207           | <b>Hydrophobic</b> | 1          | 1           |                            |
| 193           | 208           | Hydrogen           | 1          | 1.1         |                            |
| 194           | 209           |                    | 1          | 1.06        |                            |
| 195           | 210           | Hydrogen           | 1.14       | 1.27        |                            |
| 213           | 228           | Hydrophobic        | 1          | 2.07        |                            |
| 215           | 230           | <b>Hydrophobic</b> | 1          | 1.37        |                            |
| 216           | 231           | <b>Hydrophobic</b> | 1          | 1.97        | R8                         |
| 217           | 232           |                    | 1          | 2.23        | R8                         |
| 218           | 233           | <b>Hydrogen</b>    | 1          | 2.19        | R8                         |
| <b>220</b>    | <b>234</b>    | <b>Hydrophobic</b> | 1          | 1.9         | R8                         |
| 221           | 235           |                    | 1          | 1.06        |                            |
| 226           | 241           |                    | 1          | 1.06        |                            |
